# Supplementary material for: Aberrant Glycosylation in Pancreatic Ductal Adenocarcinoma 3D Organoids Is Mediated by KRAS Mutations
Source: Hindawi journal article supplement (doi:10.1155/2024/1529449), 2024-03-18
Supplement: f1 [file 1529449.f1.zip]

Supplementary Fig1

|                         | +EGF                                                                              | -EGF                                                                               |
|-------------------------|-----------------------------------------------------------------------------------|------------------------------------------------------------------------------------|
| KRAS wild-type organoid | 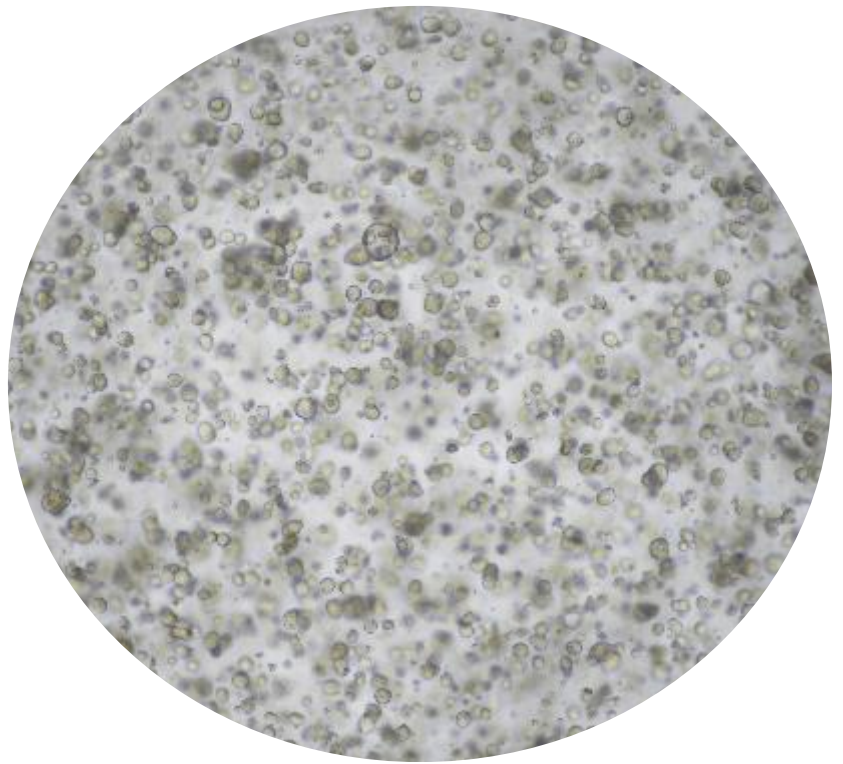 |  |
| KRAS mutant organoid    |  |  |

**Figure S1:** Brightfield images representative of organoid cultures (upper: KRAS wild-type, lower: KRAS mutant) in medium with EGF removed at day 5.

Supplementary Fig2

a Fucose binding Lectin

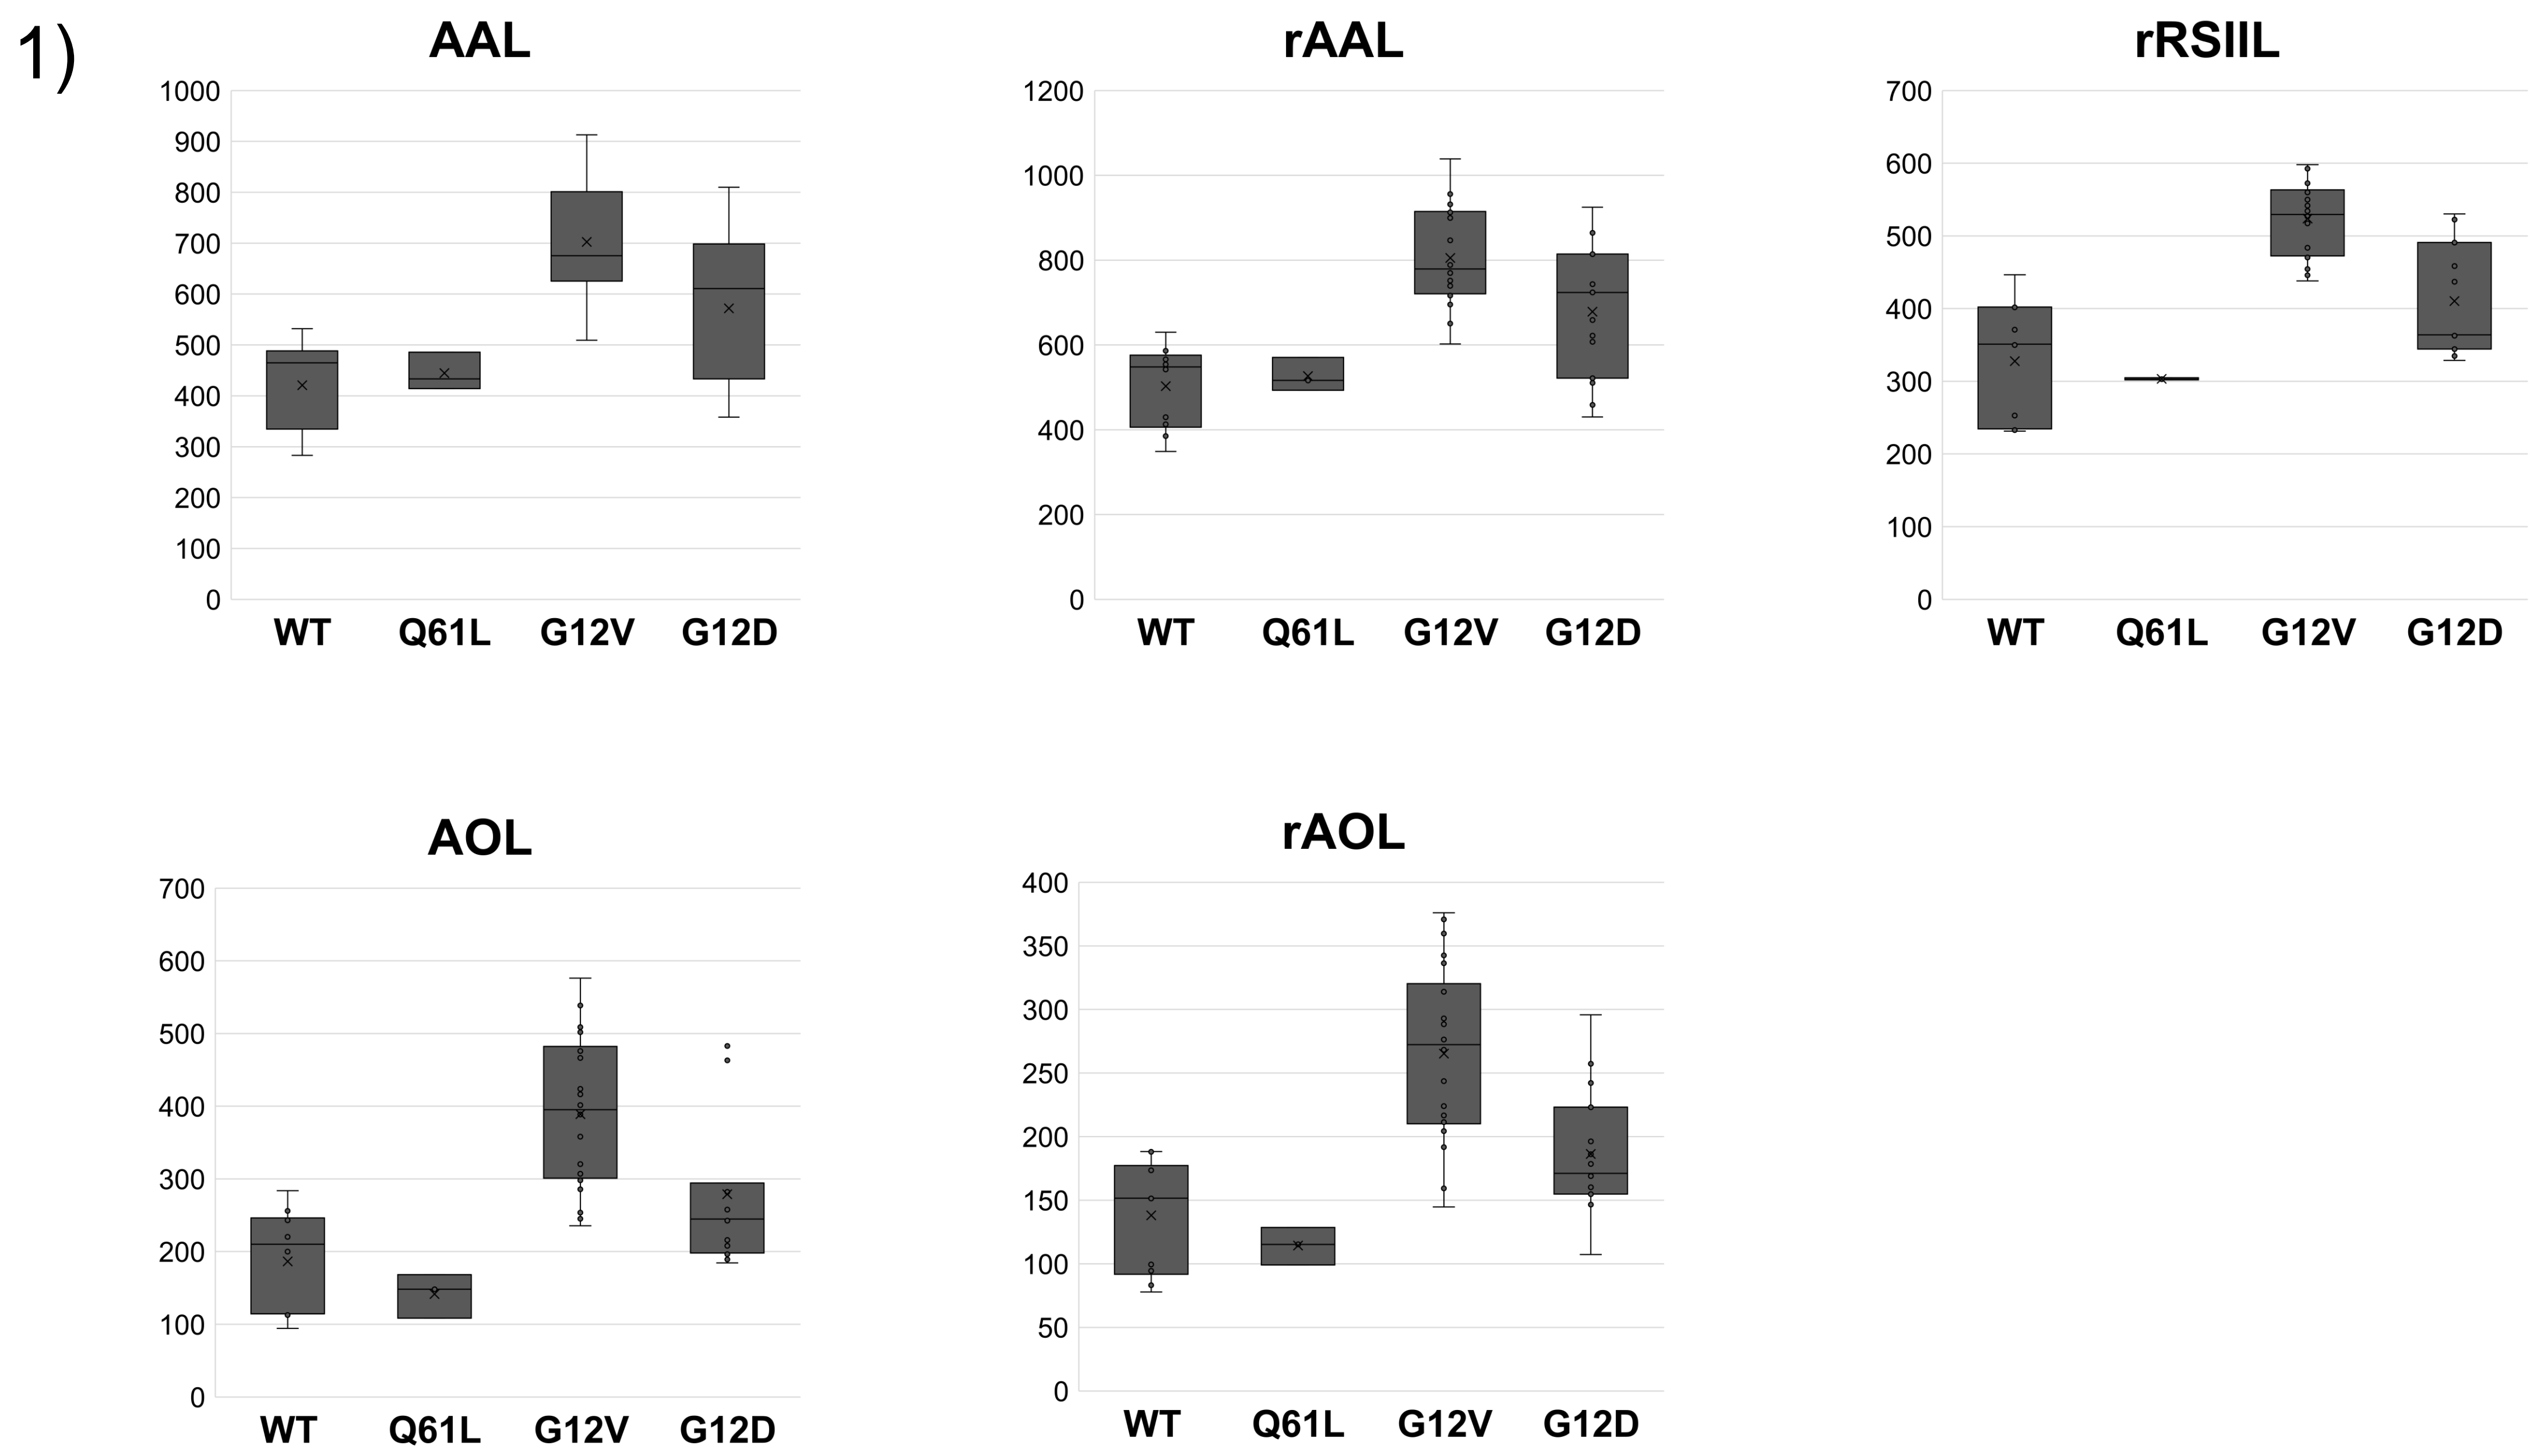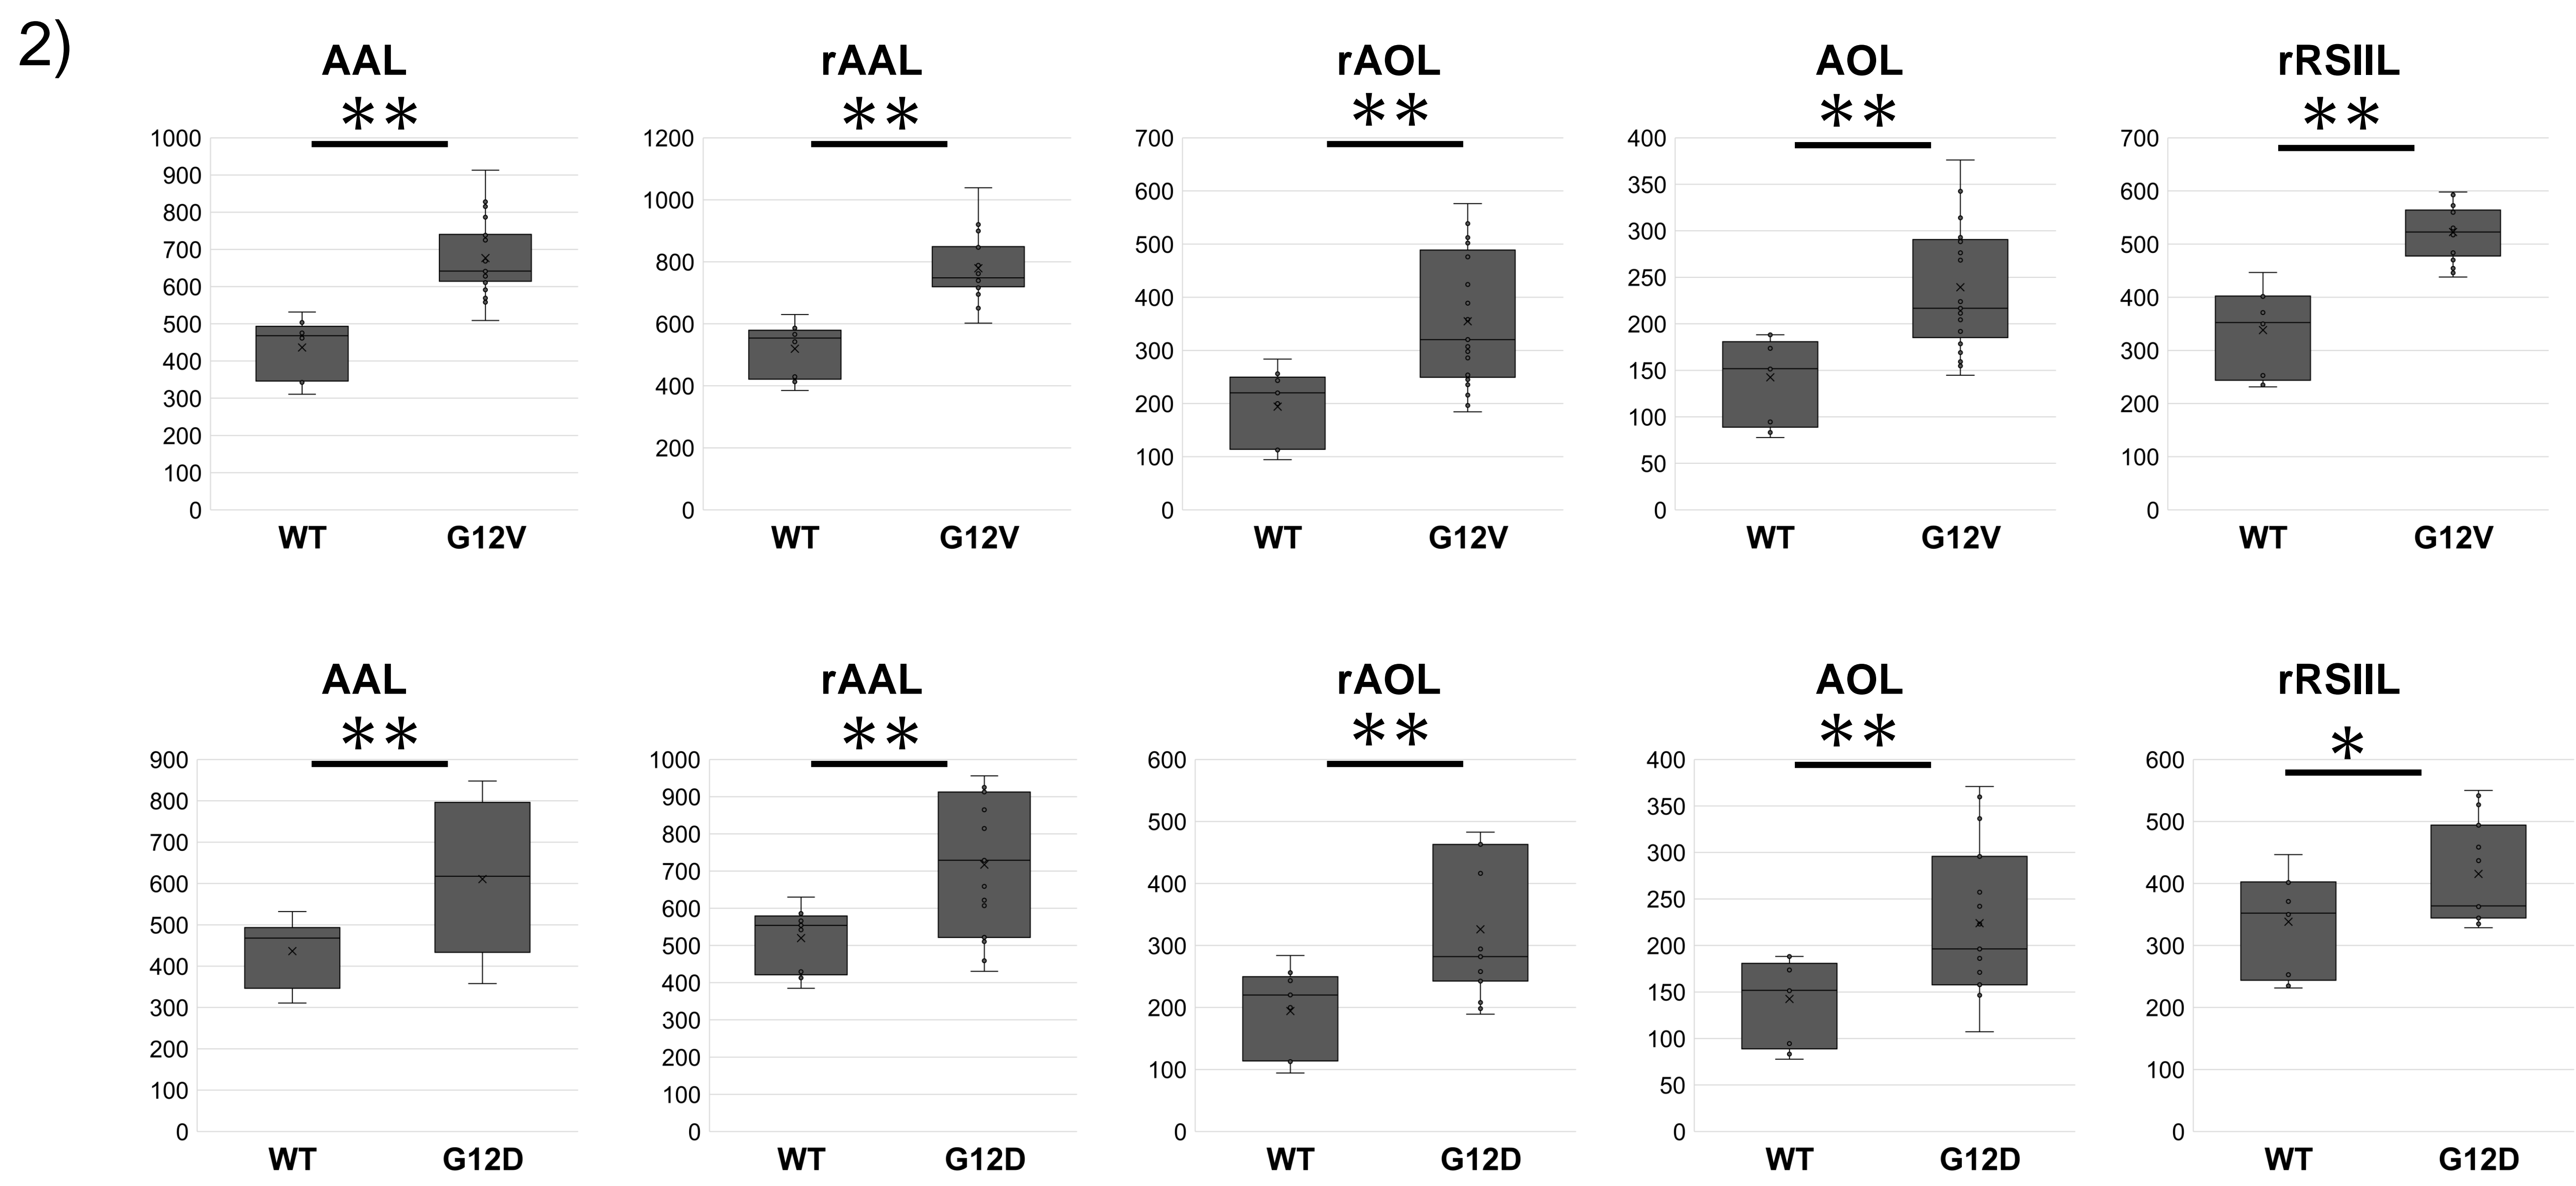

Supplementary Fig2

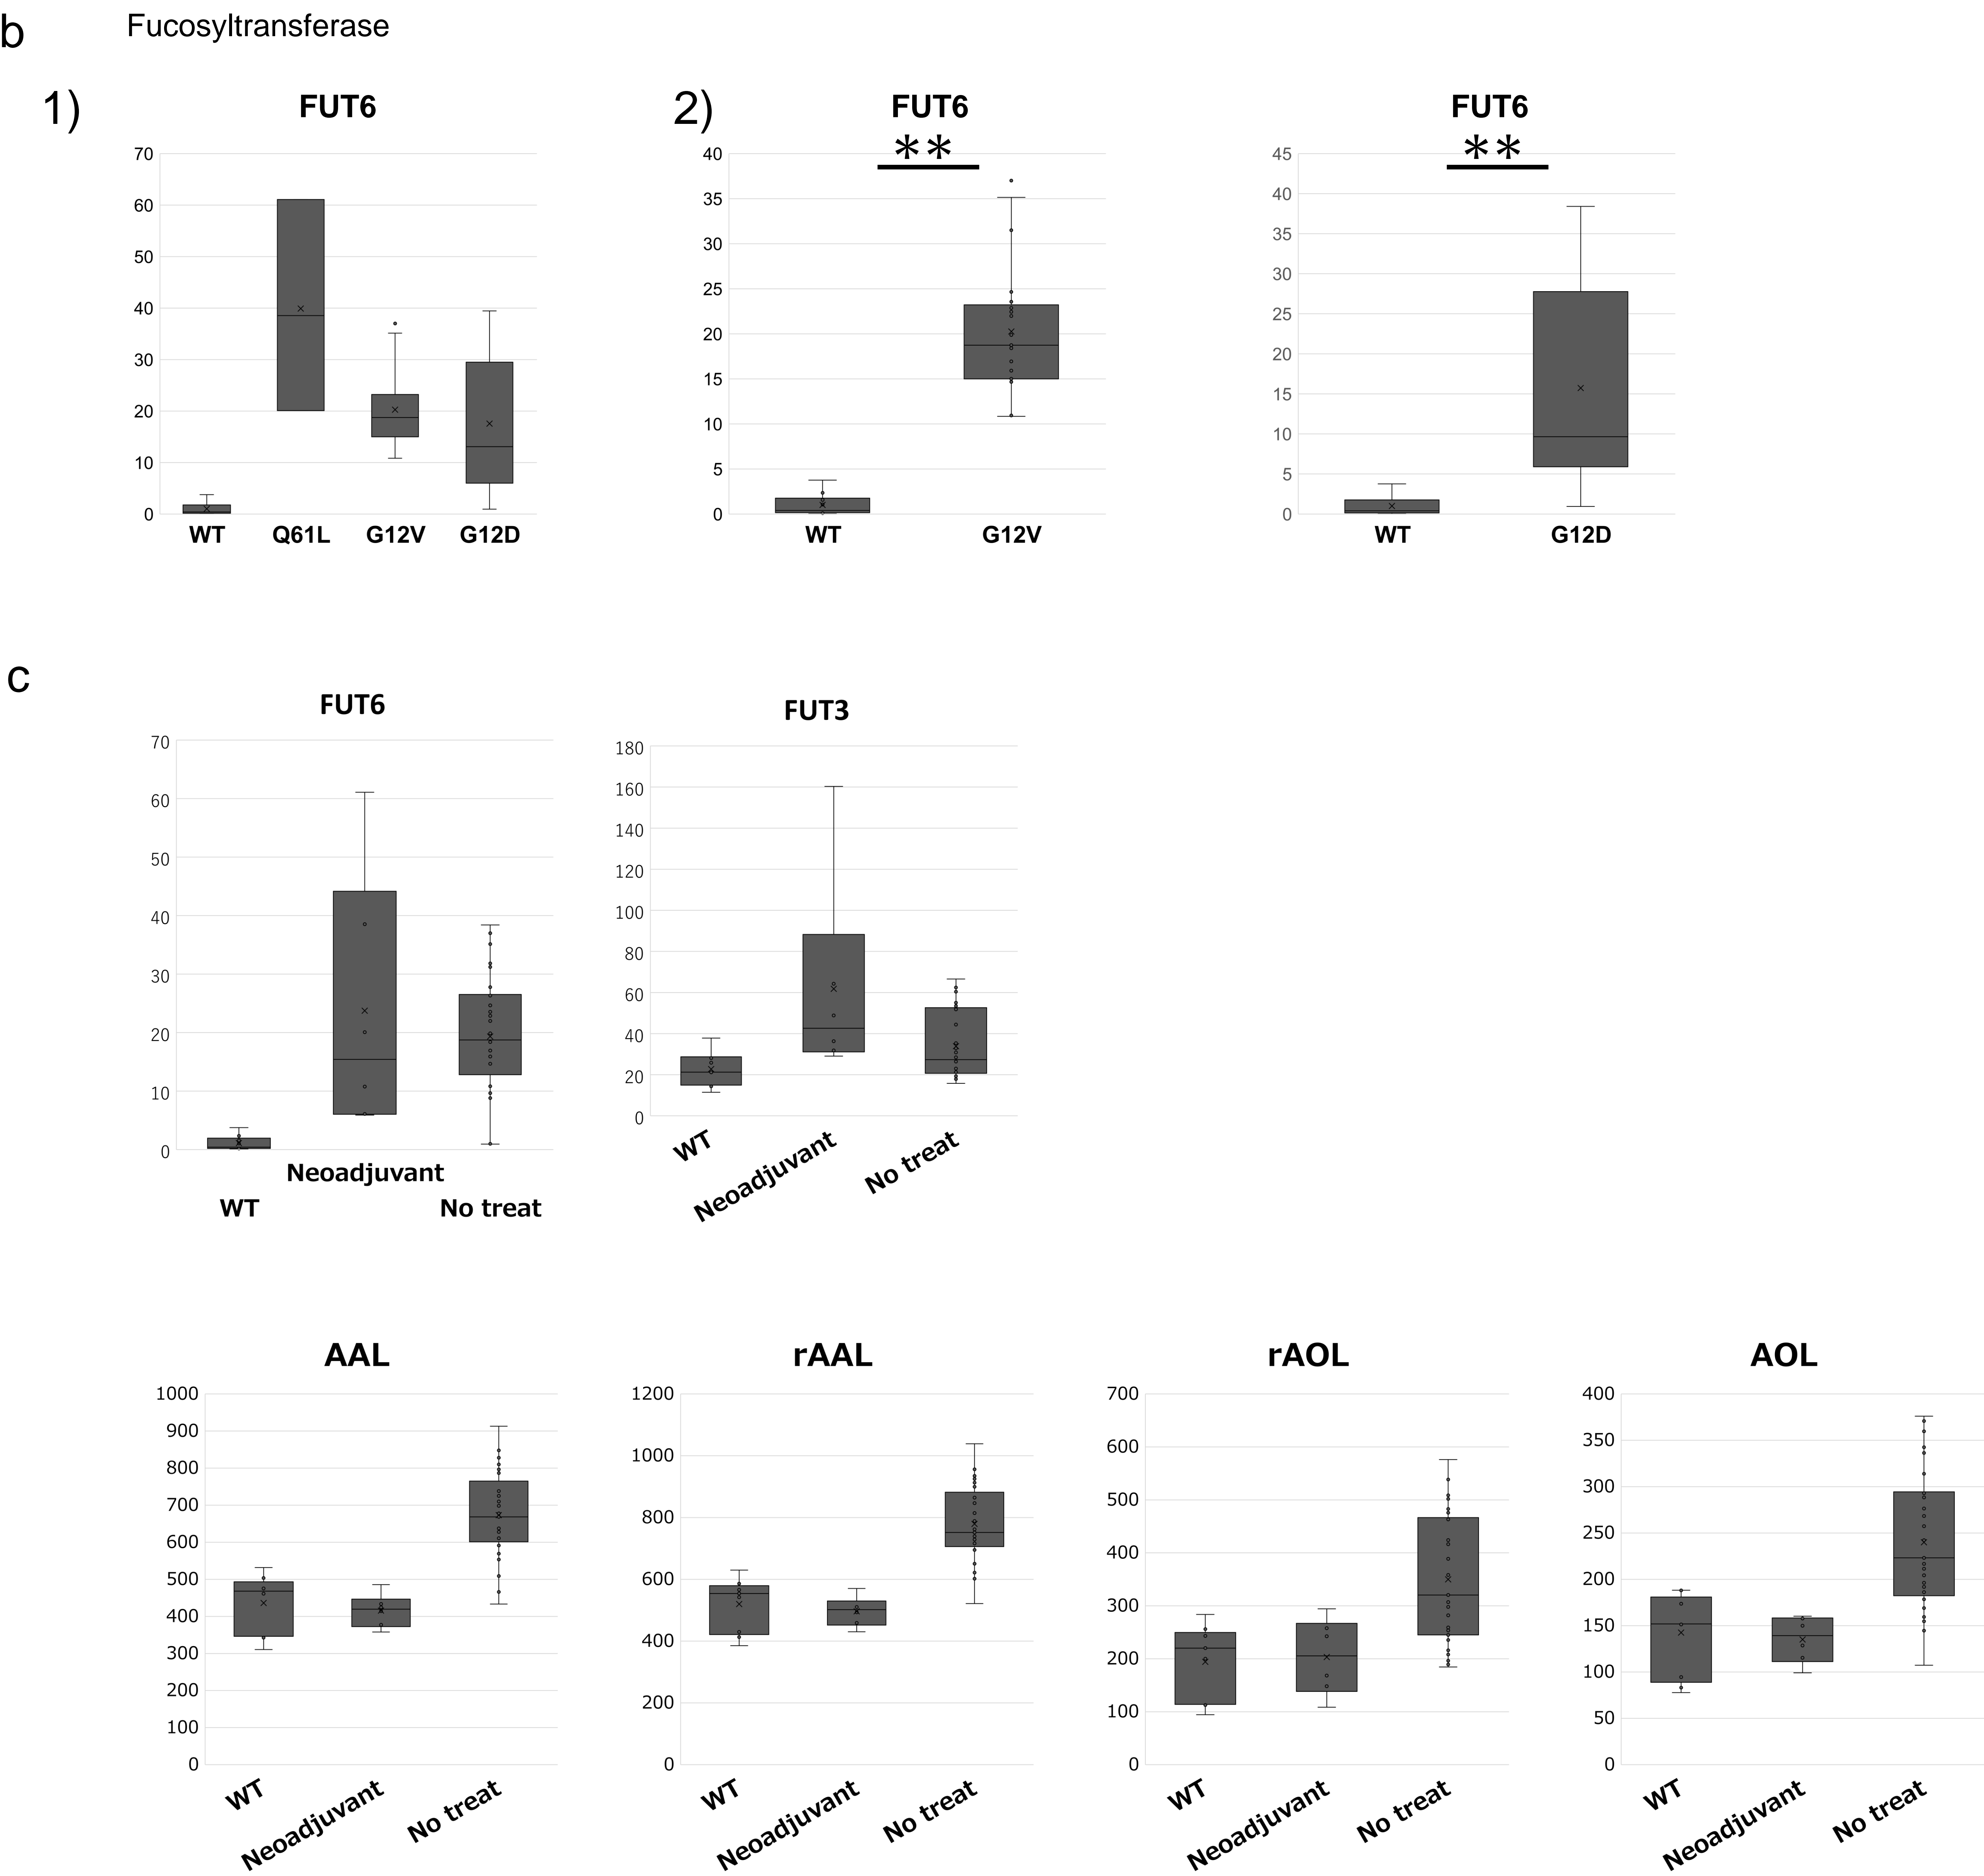

**Fig S2:** Analysis of lectin intensity and FUT6 expression by site of KRAS mutation

Data are shown as means  $\pm$  SD. Student's t test. \*\*p < 0.001. \*p < 0.05.

- a) Reactivity of fucose-binding lectin signal intensities from lectin microarray for KRAS wild -type (WT), Q61L, G12V, and G12D(a-1). Comparison of the intensities with WT and G12V, WT and G12D, respectively (a-2).
- b) Expression of the FUT6 mRNA from RNA seq for KRAS wild -type (WT), Q61L, G12V, and G12D (b-1). Comparison of the expression with WT and G12V, WT and G12D, respectively (b-2).
- c) FUT6 mRNA expression from RNA seq and reactivity of fucose-binding lectin signal intensities from lectin microarray of organoids from KRAS wild-type (WT) and preoperative treated (Neoadjuvant) and untreated (No treat) patients.

Supplementary Fig3

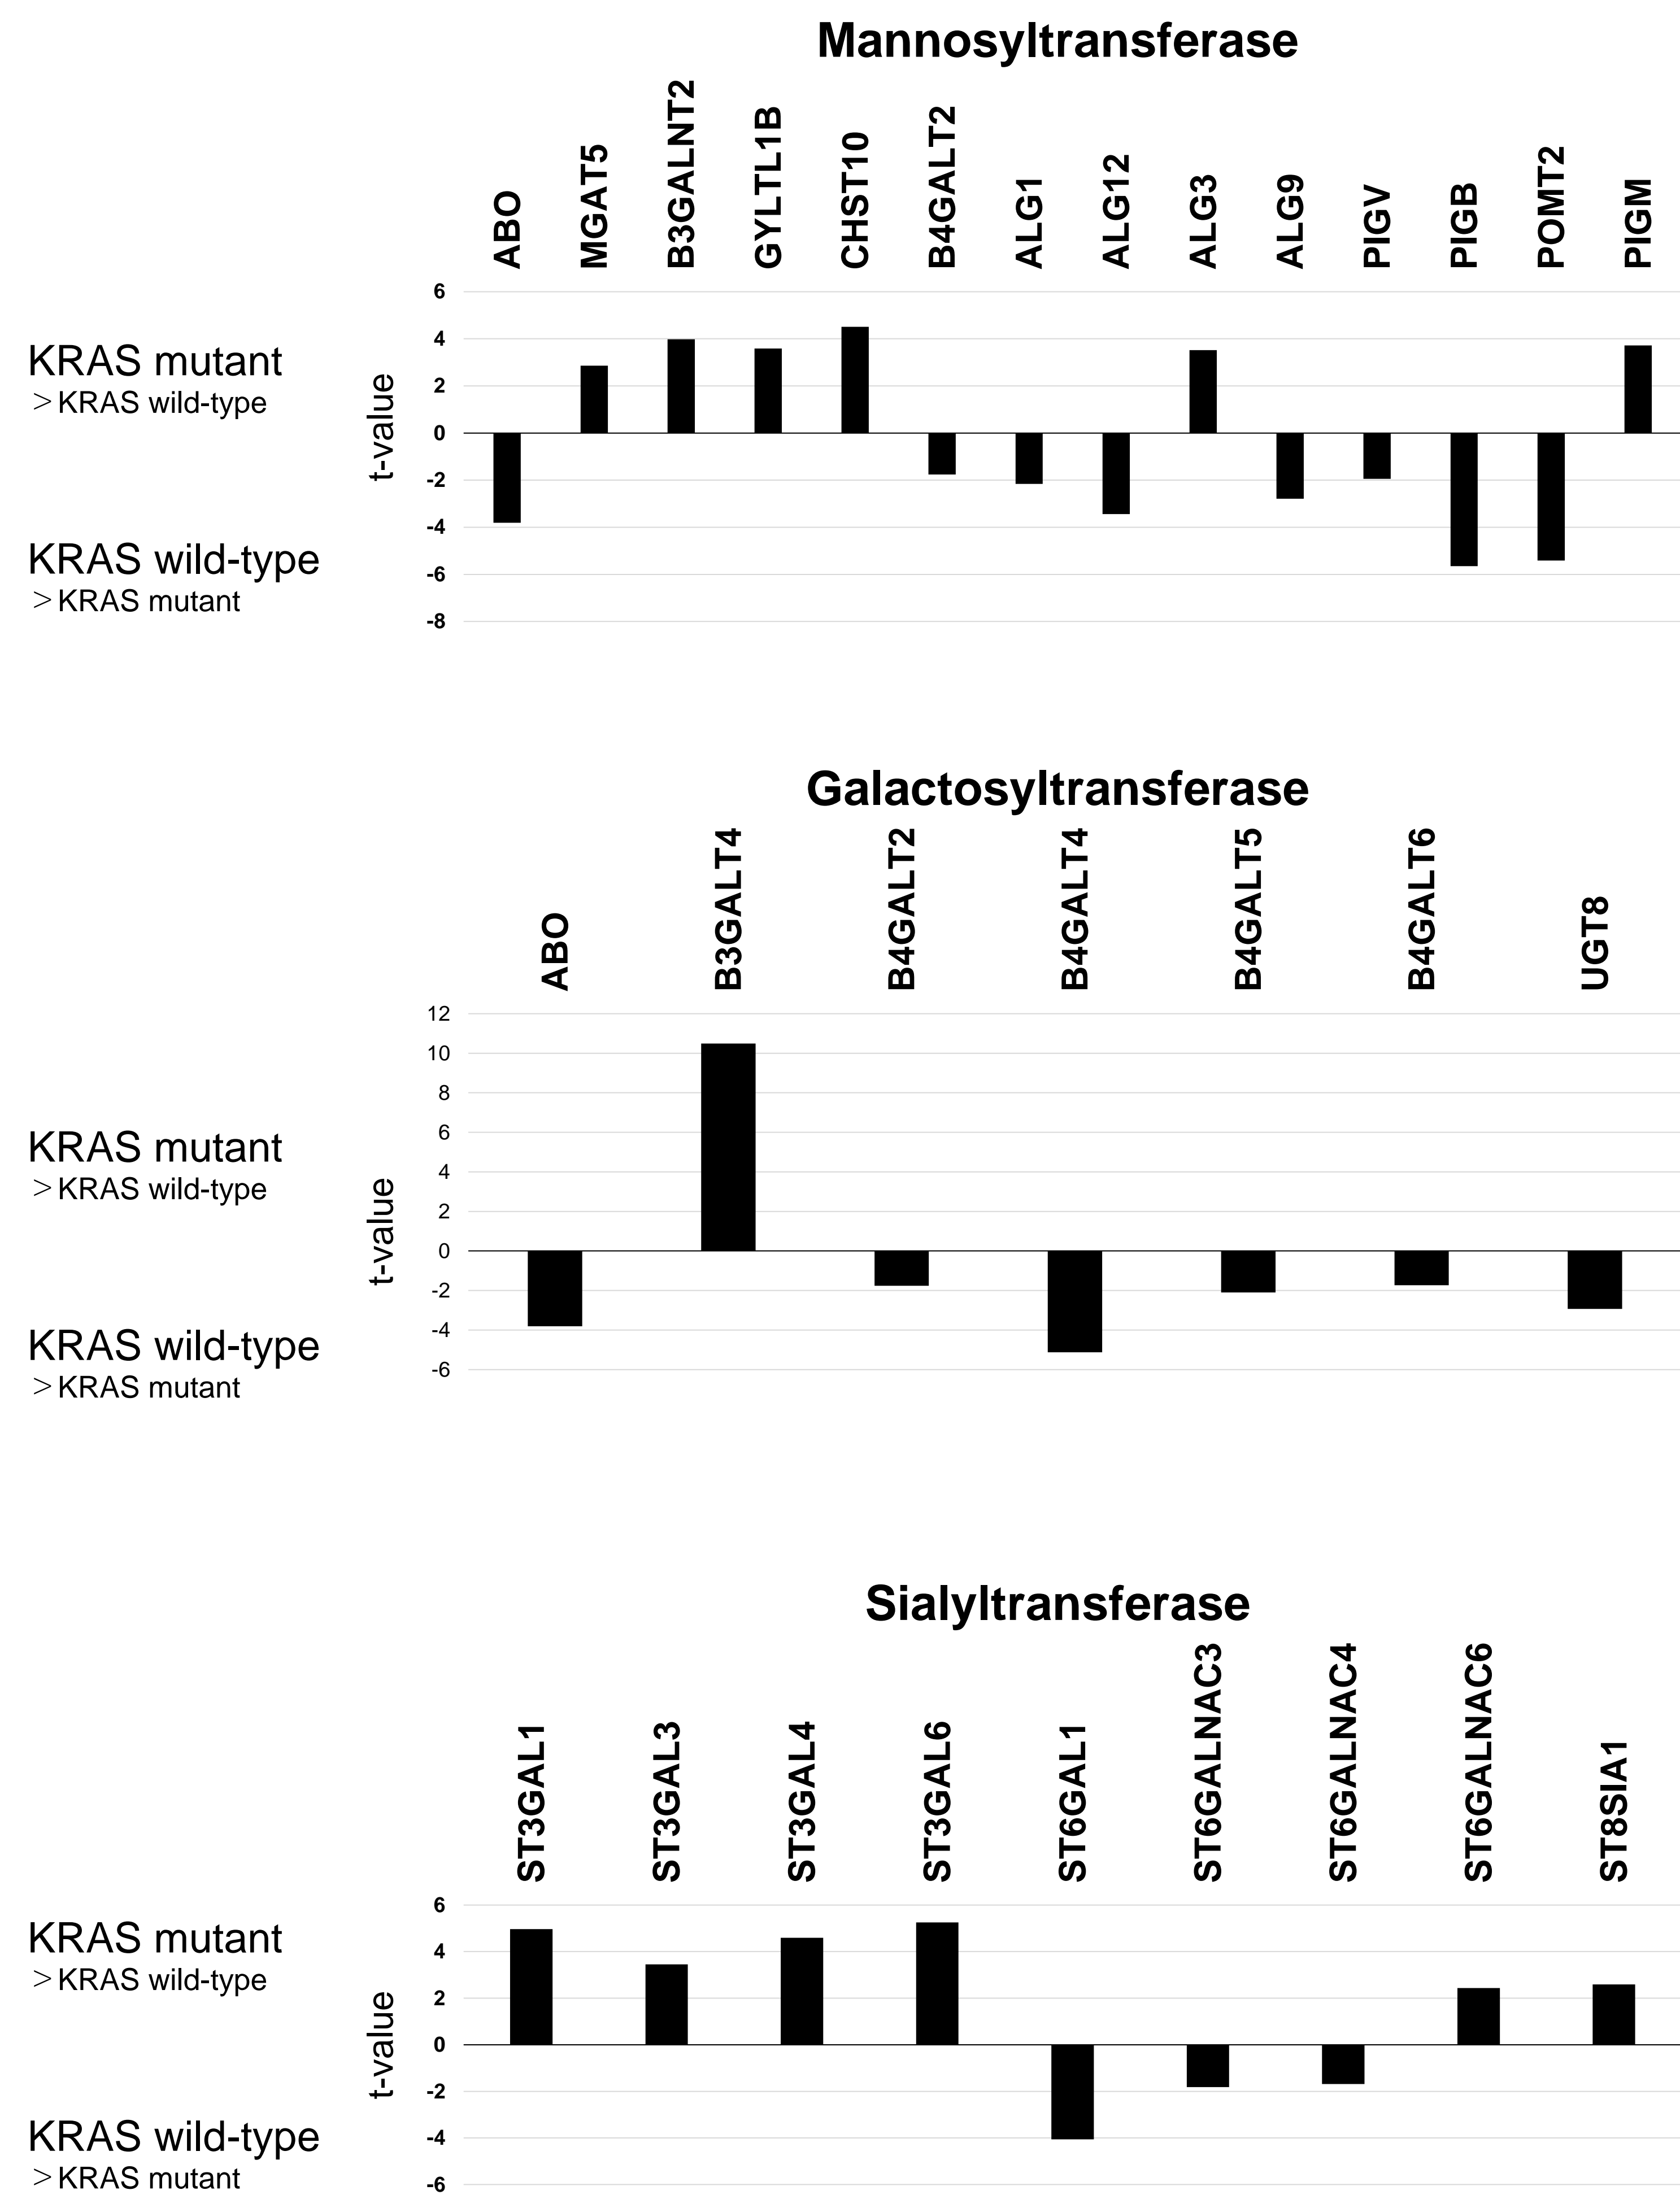

**Figure S3:** Comparison of glycosyltransferases (mannnosyltransferase, galactosyltransferase, sialyltransferase) expression based on the result of RNA-seq between KRAS mutant and KRAS wild-type organoids
